# Supplementary material for: Glucocorticoid receptor expression in patients with cardiac arrest in the early period after the return of spontaneous circulation: a prospective observational single-centre study
Source: HighWire-hosted journal article supplement (doi:10.1136/bmjopen-2021-060246), 2022-09-01
Supplement: bmjopen-2021-060246supp001_data_supplement.pdf [file bmjopen-2021-060246supp001_data_supplement.pdf]

## Electronic supplemental material

### **Glucocorticoid receptor expression in patients with cardiac arrest in the early period after the return of spontaneous circulation: A prospective observational single-center study**

Yanan Yu<sup>1</sup>; Ziren Tang<sup>1</sup>; Miaorong Xie<sup>2</sup>; Jiabao Li<sup>3</sup>; Chenchen Hang<sup>1</sup>; Le An<sup>1</sup>; Chunsheng Li<sup>1</sup> \*

<sup>1</sup>Department of Emergency Medicine, Beijing Chaoyang Hospital, Capital Medical University, Beijing 100020, China

<sup>2</sup>Department of Emergency Medicine, Beijing Friendship Hospital, Capital Medical University, Beijing 100032, China

<sup>3</sup>Department of Critical Care, Beijing Friendship Hospital, Capital Medical University, Beijing 100020, China

\*Corresponding author: Chungsheng Li, M.D.

Department of Emergency Medicine, Beijing Chaoyang Hospital,

Capital Medical University, 8 Worker's Stadium South Road, Chaoyang District, Beijing 100020, China, Tel: [+86](tel:+8613681392380)

[13681392380](tel:+8613681392380); E-mail: [lscyy@163.com](mailto:lscyy@163.com)

#### **Contents**

Supplemental Figure 1

Supplemental Figure 2

Supplemental Table 1

Supplemental Table 2

Supplemental Table 3

Supplemental Table 4

Supplemental Table 5

Supplemental Table 6

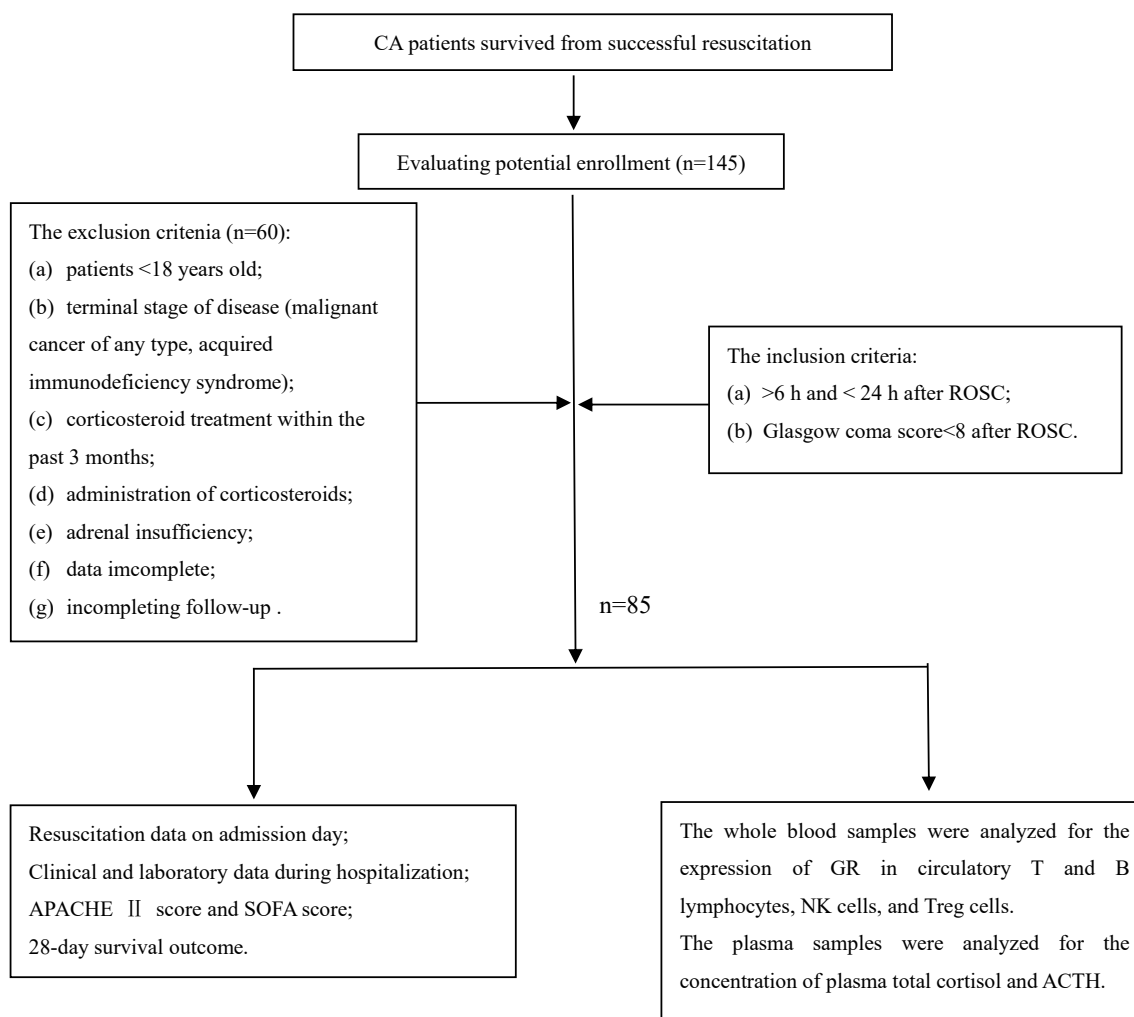

Supplemental Figure 1. The flow chart of the study.

Abbreviations: CA, cardiac arrest; ROSC, return of spontaneous circulation; APACHE II, acute physiology and chronic health evaluation II; SOFA, sequential organ failure assessment; GR, glucocorticoid receptor; Treg, regulatory T; ACTH, adrenocorticotrophic hormone.

Supplemental Figure 2. Representative plots and gating strategies for analyzing glucocorticoid receptor (GR) in the whole blood.

GR expression levels were determined on T cells, B cells, NK cells, and T regulatory (Treg) cells. Single cells were gated from all cellular events (FSC/SSC gate). B cells were identified as CD3<sup>-</sup>CD19<sup>+</sup> cells. NK cells were identified as CD16<sup>+</sup>56<sup>+</sup> cells. T cells were identified as CD3<sup>+</sup>CD4<sup>+</sup> T cells and CD3<sup>+</sup>CD8<sup>+</sup> T cells. Treg cells were identified as CD4<sup>+</sup>CD25<sup>high</sup>CD127<sup>low</sup>.

#### A. Expression of GR on T cells

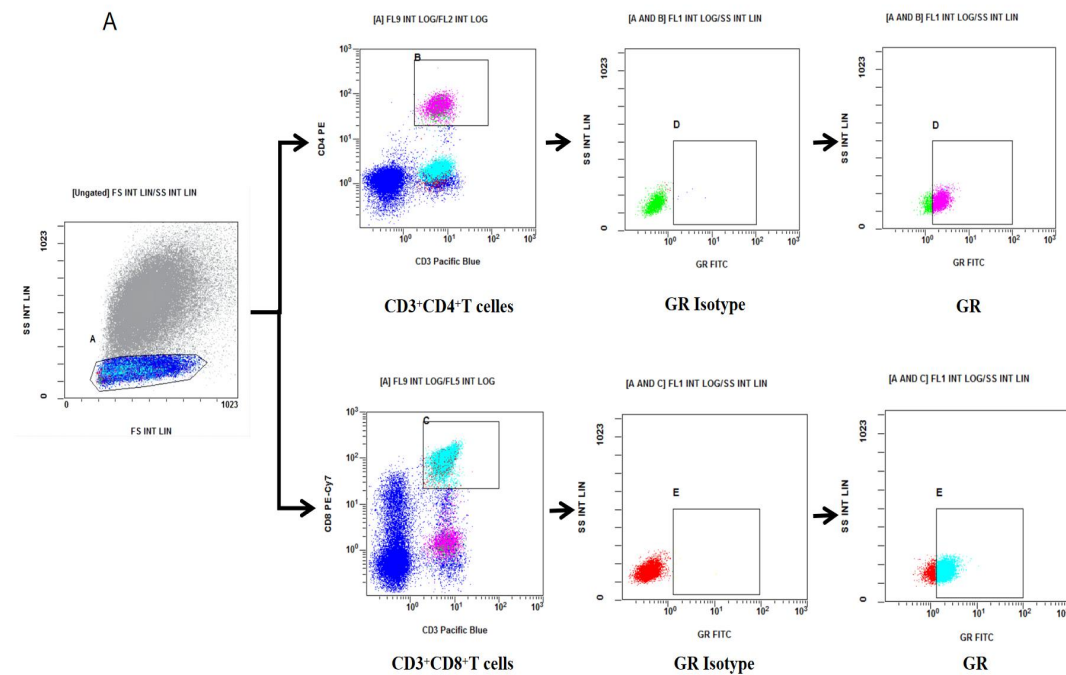

B. Expression of GR on B cells

C. Expression of GR on NK cells

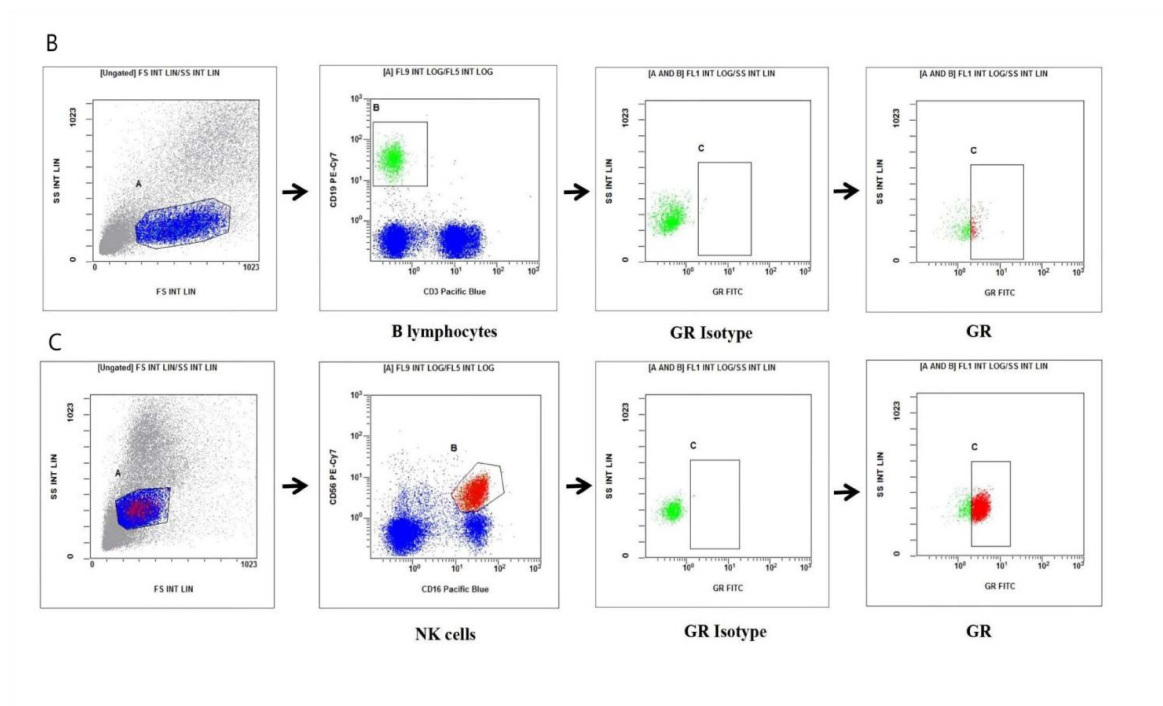

D. Expression of GR on Treg cells

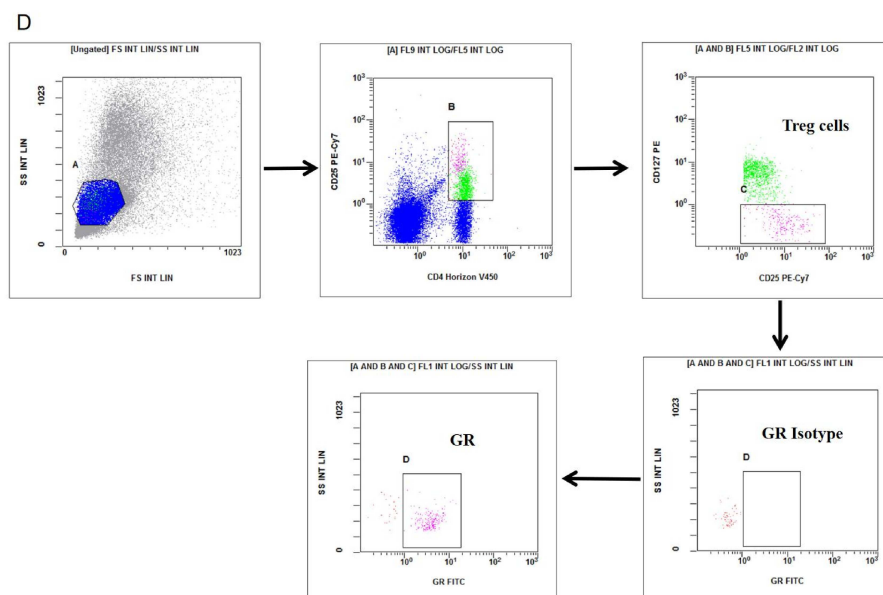

Supplemental Table 1. Details of antibodies for flow cytometry.

| Antigen                      | Catalog Number | Fluorescein Conjugate | Source                     |
|------------------------------|----------------|-----------------------|----------------------------|
| CD3                          | 558117         | Pacific Blue          | BD Pharmingen <sup>a</sup> |
| CD4                          | 555347         | PE                    | BD Pharmingen              |
| CD4                          | 560345         | Horizon V450          | BD Pharmingen              |
| CD8                          | 557746         | PE-Cy7                | BD Pharmingen              |
| CD19                         | 557835         | PE-Cy7                | BD Pharmingen              |
| CD16                         | 558122         | Pacific Blue          | BD Pharmingen              |
| CD56                         | 557747         | PE-Cy7                | BD Pharmingen              |
| CD25                         | 557741         | PE-Cy7                | BD Pharmingen              |
| CD127                        | 557938         | PE                    | BD Pharmingen              |
| GR                           | MCA2469F       | FITC                  | Bio-Rad <sup>b</sup>       |
| Mouse IgG1 Isotype           | MCA928F        | FITC                  | Bio-Rad                    |
| Mouse IgG1, $\kappa$ Isotype | 557872         | PE-Cy7                | BD Pharmingen              |
| Mouse IgG1, $\kappa$ Isotype | 554680         | PE                    | BD Pharmingen              |
| Mouse IgG1, $\kappa$ Isotype | 558120         | Pacific Blue          | BD Pharmingen              |

<sup>a</sup> BD Pharmingen, San Diego, USA; <sup>b</sup> Bio-Rad AbD Serotec, Oxford, UK.

Abbreviations: CD, cluster-of-differentiation; PE, phycoerythrin; FITC, fluorescein isothiocyanate; GR, glucocorticoid receptor; Ig: immunoglobulin.

Supplemental Table 2. Characteristics of CA survivors and non-survivors on admission.

|                                                    | <b>Survivors (n=20)</b> | <b>Non-survivors (n=65)</b> |
|----------------------------------------------------|-------------------------|-----------------------------|
| Age (years), median [IQR]                          | 59.0 (53.3, 72.8)       | 66.0 (59.0, 75.5)           |
| Male/Female (n)                                    | 12/8                    | 46/19                       |
| Cardiac arrest cause (n, %)                        |                         |                             |
| Cardiac                                            | 10 (50.0%)              | 24 (36.9%)                  |
| Non-Cardiac                                        | 10 (50.0%)              | 41 (63.1%)                  |
| Initial resuscitation                              |                         |                             |
| Time to ROSC (min), median [IQR]                   | 15.0 (7.3, 26.0)        | 20.0 (15.0, 30.0)           |
| Adrenaline (mg), median [IQR]                      | 1.0 (0.0, 3.0)          | 2.0 (0.0, 5.0)              |
| Initial rhythm VF/VT, n (%)                        | 11 (55.0%)              | 19 (29.2%)                  |
| MAP (mmHg), median [IQR]                           | 89.9 (70.5, 104.9)      | 70.7 (50.0, 93.5)           |
| White cell count ( $\times 10^9/L$ ), median [IQR] | 12.40 (6.98, 18.76)     | 13.80 (11.67, 18.20)        |
| Lactate (mmol/L), median [IQR]                     | 3.50 (1.33, 7.05)       | 7.50 (3.80, 11.20)          |
| APACHE II score, mean $\pm$ SD                     | 27.8 $\pm$ 6.6          | 34.4 $\pm$ 5.6              |
| SOFA score, median [IQR]                           | 9.0 (7.3, 11.8)         | 12.0 (9.0, 15.0)            |

Data are presented as mean $\pm$ SD or interquartile range (IQR) as appropriate. Abbreviations: ROSC: return of spontaneous circulation; VF: ventricular fibrillation; VT: ventricular tachycardia; MAP: mean arterial pressure; APACHE II: acute physiology and chronic health evaluation; SOFA: sequential organ failure assessment.

Supplemental Table 3. The flow cytometry results of cell counts and ratios of the healthy control group and successful resuscitation group

|                                                                  | <b>Healthy Control<br/>Group (n=40)</b> | <b>Successful<br/>Resuscitation Group<br/>(n=85)</b> | <b>Z-value</b> | <b>P-value</b> |
|------------------------------------------------------------------|-----------------------------------------|------------------------------------------------------|----------------|----------------|
| T lymphocyte count (cells / $\mu$ L)                             | 1586.0 (1101.5, 2192.5)                 | 514.0 (287.5, 1555.0)                                | -4.515         | <0.001         |
| NK cell count (/ $\mu$ L)                                        | 311.5 (191.0, 378.8)                    | 101.0 (36.0, 351.5)                                  | -3.332         | 0.001          |
| B lymphocyte count (/ $\mu$ L)                                   | 109.3 (63.7, 183.3)                     | 25.7 (9.4, 92.3)                                     | -5.076         | <0.001         |
| Treg count (/ $\mu$ L)                                           | 0.259 (0.095, 0.516)                    | 0.233 (0.135, 0.488)                                 | -5.518         | <0.001         |
| Treg / CD4 <sup>+</sup> T lymphocyte Ratio                       | 0.039 (0.028, 0.054)                    | 0.021 (0.010, 0.038)                                 | -4.418         | <0.001         |
| CD3 <sup>+</sup> CD4 <sup>+</sup> T lymphocyte count (/ $\mu$ L) | 421.7 (258.6, 627.4)                    | 38.9 (17.6, 168.3)                                   | -6.256         | <0.001         |
| CD3 <sup>+</sup> CD4 <sup>+</sup> / T lymphocyte Ratio           | 0.292 (0.227, 0.340)                    | 0.100 (0.054, 0.160)                                 | -7.066         | <0.001         |
| CD3 <sup>+</sup> CD8 <sup>+</sup> T lymphocyte count (/ $\mu$ L) | 241.1 (139.5, 488.6)                    | 26.3 (7.2, 135.9)                                    | -5.287         | <0.001         |
| CD3 <sup>+</sup> CD8 <sup>+</sup> / T lymphocyte Ratio           | 0.157 (0.126, 0.229)                    | 0.053 (0.026, 0.104)                                 | -5.719         | <0.001         |

All the data in Supplemental table 3 are represented as the median [IQR]; IQR: Interquartile Range; CD: cluster-of-differentiation; GR, glucocorticoid receptor; NK, natural killer; Treg, regulatory T.

Supplemental Table 4. The flow cytometry results of cell counts and ratios of the CA patients on admission based on 28-day survival

|                                                            | Survivors (n=20)      | Non-survivors<br>(n=65) | Z-value | P-value |
|------------------------------------------------------------|-----------------------|-------------------------|---------|---------|
| T lymphocyte count (/μL)                                   | 502.0 (353.8, 1199.8) | 514.0 (282.5, 1891.0)   | -0.186  | 0.852   |
| NK cell count (/μL)                                        | 167.0 (29.8, 309.3)   | 100.0 (36.0, 404.0)     | -0.218  | 0.828   |
| B lymphocyte count (/μL)                                   | 38.6 (15.7, 103.5)    | 19.2 (7.1, 65.7)        | -0.632  | 0.527   |
| Tregs count (/μL)                                          | 0.318 (0.145, 0.552)  | 0.212 (0.128, 0.479)    | -0.611  | 0.396   |
| Treg / CD4 <sup>+</sup> T lymphocyte Ratio                 | 0.025 (0.009, 0.043)  | 0.021 (0.010, 0.034)    | -0.498  | 0.619   |
| CD3 <sup>+</sup> CD4 <sup>+</sup> T lymphocyte count (/μL) | 55.1 (32.4, 228.0)    | 38.0 (16.0, 168.1)      | -0.850  | 0.396   |
| CD3 <sup>+</sup> CD4 <sup>+</sup> / T lymphocyte Ratio     | 0.118 (0.070, 0.236)  | 0.097 (0.049, 0.142)    | -1.565  | 0.118   |
| CD3 <sup>+</sup> CD8 <sup>+</sup> T lymphocyte count (/μL) | 25.4 (12.5, 96.2)     | 26.3 (6.3, 138.8)       | -0.021  | 0.983   |
| CD3 <sup>+</sup> CD8 <sup>+</sup> / T lymphocyte Ratio     | 0.054 (0.033, 0.104)  | 0.053 (0.025, 0.104)    | -0.187  | 0.852   |

All the data in Supplemental table 4 are represented as the median [IQR]; IQR: Interquartile Range; CD: cluster-of-differentiation; GR, glucocorticoid receptor; NK, natural killer; Treg, regulatory T.



Supplemental Table 5. The flow cytometry results of GR expression in the CA group and successful resuscitation group.

|                                                                     | <b>Healthy Control<br/>Group (n=40)</b> | <b>Successful<br/>Resuscitation Group<br/>(n=85)</b> | <b>Z-value</b> | <b>P-value</b> |
|---------------------------------------------------------------------|-----------------------------------------|------------------------------------------------------|----------------|----------------|
| Percentage of GR on B lymphocytes                                   | 0.963 (0.885, 0.992)                    | 0.896 (0.605, 0.949)                                 | -3.742         | <0.001         |
| MFI of GR on B lymphocytes                                          | 2.48 (1.91, 3.31)                       | 1.73 (1.50, 2.37)                                    | -3.980         | <0.001         |
| Percentage of GR on T lymphocytes                                   | 0.964 (0.889, 0.986)                    | 0.900 (0.703, 0.955)                                 | -3.755         | <0.001         |
| MFI of GR on T lymphocytes                                          | 2.98(1.95, 3.68)                        | 1.92 (1.36, 1.99)                                    | -3.853         | <0.001         |
| Percentage of GR on NK cells                                        | 0.907 (0.624, 0.983)                    | 0.611 (0.306, 0.840)                                 | -3.792         | <0.001         |
| MFI of GR on NK cells                                               | 2.19 (1.48, 2.96)                       | 1.60 (1.36, 1.99)                                    | -3.171         | 0.002          |
| Percentage of GR on Treg cells                                      | 0.848 (0.680, 0.978)                    | 0.784 (0.589, 0.911)                                 | -1.837         | 0.066          |
| MFI of GR on Treg cells                                             | 2.12 (1.53, 2.88)                       | 1.76 (1.44, 2.30)                                    | -1.990         | 0.047          |
| Percentage of GR on CD3 <sup>+</sup> CD4 <sup>+</sup> T lymphocytes | 0.980 (0.874, 0.996)                    | 0.957 (0.824, 0.985)                                 | -2.204         | 0.100          |
| MFI of GR on CD3 <sup>+</sup> CD4 <sup>+</sup> T lymphocytes        | 2.65 (1.75, 3.38)                       | 2.17 (1.70, 2.92)                                    | -1.646         | 0.027          |
| Percentage of GR on CD3 <sup>+</sup> CD8 <sup>+</sup> T lymphocytes | 0.986 (0.868, 0.996)                    | 0.938 (0.823, 0.979)                                 | -2.758         | 0.006          |
| MFI of GR on CD3 <sup>+</sup> CD8 <sup>+</sup> T lymphocytes        | 2.73 (1.73, 3.02)                       | 2.10 (1.68, 2.54)                                    | -2.668         | 0.008          |

All the data in Supplemental table 5 are represented as the median [IQR]. Abbreviations: IQR, interquartile range; CD, cluster-of-differentiation; NK, natural killer; Treg, regulatory T; GR, Glucocorticoid receptor; MFI, mean fluorescence intensity.

Supplemental Table 6. The flow cytometry results of GR expression in the survivors and non-survivors.

|                                                                     | <b>Survivors</b>     | <b>Non-survivors</b> | <b>Z-value</b> | <b>P-value</b> |
|---------------------------------------------------------------------|----------------------|----------------------|----------------|----------------|
|                                                                     | <b>(n=20)</b>        | <b>(n=65)</b>        |                |                |
| Percentage of GR on B lymphocytes                                   | 0.904 (0.595, 0.976) | 0.906 (0.657, 0.946) | -0.787         | 0.431          |
| MFI of GR on B lymphocytes                                          | 1.92 (1.52, 2.54)    | 1.72 (1.51, 2.31)    | -0.881         | 0.378          |
| Percentage of GR on T lymphocytes                                   | 0.899 (0.778, 0.969) | 0.913 (0.692, 0.951) | -1.057         | 0.291          |
| MFI of GR on T lymphocytes                                          | 2.05 (1.67, 2.83)    | 1.91 (1.64, 2.46)    | -1.031         | 0.303          |
| Percentage of GR on NK cells                                        | 0.717 (0.292, 0.886) | 0.556 (0.302, 0.823) | -0.756         | 0.449          |
| MFI of GR on NK cells                                               | 1.54 (1.37, 2.09)    | 1.61 (1.34, 1.87)    | -0.565         | 0.572          |
| Percentage of GR on Tregs                                           | 0.780 (0.667, 0.849) | 0.799 (0.576, 0.923) | -0.440         | 0.660          |
| MFI of GR on Tregs                                                  | 1.61 (1.48, 2.30)    | 1.77 (1.45, 2.27)    | -0.005         | 0.996          |
| Percentage of GR on CD3 <sup>+</sup> CD4 <sup>+</sup> T lymphocytes | 0.975 (0.876, 0.985) | 0.957 (0.845, 0.987) | -0.617         | 0.538          |
| MFI of GR on CD3 <sup>+</sup> CD4 <sup>+</sup> T lymphocytes        | 2.08 (1.72, 3.35)    | 2.22 (1.71, 2.69)    | -0.865         | 0.387          |
| Percentage of GR on CD3 <sup>+</sup> CD8 <sup>+</sup> T lymphocytes | 0.963 (0.816, 0.977) | 0.938 (0.834, 0.980) | -0.254         | 0.800          |
| MFI of GR on CD3 <sup>+</sup> CD8 <sup>+</sup> T lymphocytes        | 2.08 (1.68, 3.10)    | 2.11(1.71, 2.46)     | -0.653         | 0.514          |

All the data in Supplemental table 6 are represented as the median [IQR]. Abbreviations: IQR, Interquartile Range; CD, Cluster-of-differentiation; NK, natural killer; Treg, regulatory T; GR, glucocorticoid receptor; MFI, mean fluorescence intensity.
